# Supplementary material for: Cost-effectiveness of micafungin as an alternative to fluconazole empiric treatment of suspected ICU-acquired candidemia among patients with sepsis: a model simulation
Source: Springer Nature journal article supplement (doi:10.1186/cc7924), 2009-06-19
Supplement: Additional file 1 [file cc7924-s1.doc]

**Table S1. Input sources for estimating the prevalence of nosocomial candidemia in critically ill patients***

| **Authors** | **Location** | **Publication year** | **Study year(s)** | **% candidemia** |
| --- | --- | --- | --- | --- |
| Alberti [14] | Europe, Canada, Israel | 2002 | 1997-1998 | 9.7 |
| Brun-Buisson [15] | France | 2004 | 2001 | 7.7 |
| Vincent [16] | Europe | 2006 | 2002 | 20.0 |
| Xie [17] | China | 2008 | 2004-2005 | 28.3 |

No US-based studies were identified. Limited to studies in adult ICUs published in year 2000 or later.

**Table S2. Input sources for estimating the prevalence of *C. krusei* and *C. glabrata* as a proportion of all nosocomial candidemia in critically ill patients***

| **Authors** | **Publication year** | **Study year(s)** | **% glabrata** | **% krusei** |
| --- | --- | --- | --- | --- |
| Blumberg [6] | 2001 | 1993-1995 | 19.0% | 2.4% |
| Trick [21] | 2002 | 1989-1999 | 12.0% | 1.0% |
| Swoboda [9] | 2003 | 1990-2002 | 36.1% | 0% |
| Davis [4] | 2007 | 1997-2002 | 13.2% | 0% |
| Shorr [8] | 2007 | 2001-2004 | 18.2% | 0.7% |
| Chow [7] | 2008 | 1995-2005 | 22.6% | 2.1% |

*Studies limited to adult ICUs in the US published in year 2000 or later.
